# Supplementary material for: Highly Efficient Vertical Transmission for Zika Virus in Aedes aegypti after Long Extrinsic Incubation Time
Source: PubMed Central journal article supplement (PMC7281418; doi:10.3390/pathogens9050366), 2020-05-11
Supplement: pathogens-09-00366-s001.pdf [file pathogens-09-00366-s001.pdf]

**Supplementary Materials:** The following are available online at [www.mdpi.com/xxx/s1](http://www.mdpi.com/xxx/s1), Figure S1: Standard curve for absolute quantification of ZIKV gRNA. Table S1. Number of mosquitoes analyzed in the VT assay presented in Figure 3.

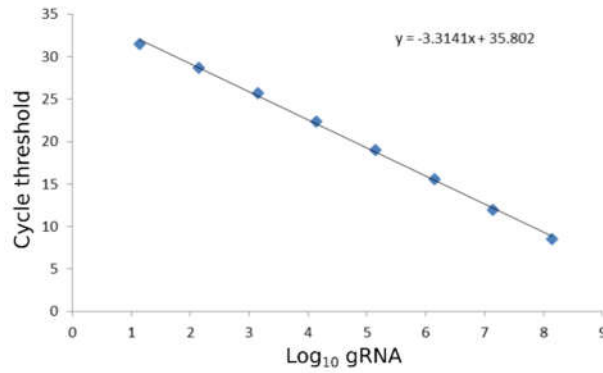

**Figure S1.** Standard curve for absolute quantification of ZIKV gRNA. Concentration of in vitro-transcribed RNA qPCR target was calculated and used to estimate gRNA copies. Ten-fold dilutions were used to calculate the equation between cycle threshold (Ct) and gRNA copies. The equation was then used to calculate gRNA copies in samples.

**Table S1.** Number of mosquitoes analyzed in the vertical transmission (VT) assay presented in Figure 3.

| Condition | Rep. | Selected females | Infectious blood feeding | Oviposition at 3 d.p.i. | Blood feeding at 7 d.p.i. | Oviposition at 10 d.p.i. | Blood feeding at 14 d.p.i. | Oviposition at 17 d.p.i. |
|-----------|------|------------------|--------------------------|-------------------------|---------------------------|--------------------------|----------------------------|--------------------------|
| A         | 1    | 98               | 73                       | 62                      | 45                        | 28                       | 17                         | 8                        |
|           | 2    | 147              | 99                       | 72                      | 36                        | 25                       | 14                         | 9                        |
| B         | 1    | 71               | Na                       | Na                      | Na                        | 24                       | 22                         | 71                       |
|           | 2    | 100              | Na                       | Na                      | Na                        | 24                       | 16                         | 100                      |

d.p.i.—days post oral infection; Na—Not applicable.
